# Supplementary material
Source: publisher figshare collection journal article supplement (https://acs.figshare.com/ndownloader/files/4514728)
Supplement: Supplementary file 1 [file 4514728]

*Supporting Information to the manuscript:*

Mercury(II) Recognition and Fluorescence Imaging *in vitro* through a 3D-Complexation Structure

Mei-Lin Ho,<sup>†,\*</sup> Kew-Yu Chen,<sup>‡</sup> Gene-Hsiang Lee,<sup>‡</sup> Yu-Chun Chen,<sup>‡</sup> Chih-Chieh Wang,<sup>†</sup> Jyh-Fu Lee,<sup>§</sup>

Wen-Chun Chung<sup>†</sup> and Pi-Tai Chow<sup>‡,\*</sup>

<sup>†</sup> Department of Chemistry, Soochow University, Taipei, Taiwan.

<sup>‡</sup> Department of Chemistry, National Taiwan University, Taipei, Taiwan.

<sup>§</sup> National Synchrotron Radiation Research Center, Hsinchu 300, Taiwan.

E-mail: meilin\_ho@scu.edu.tw, chop@ntu.edu.tw

**Supporting Information**

|                                                                                                           |       |
|-----------------------------------------------------------------------------------------------------------|-------|
| <b>Table of contents</b> .....                                                                            | S1-S2 |
| 1. <sup>1</sup> H NMR spectrum of <b>TTBQ</b> in CDCl <sub>3</sub> . (Figure S1).....                     | S3    |
| 2. The extension of <sup>1</sup> H NMR spectrum of <b>TTBQ</b> in CDCl <sub>3</sub> . (Figure S2) .....   | S4    |
| 3. <sup>13</sup> C NMR (125 MHz, CDCl <sub>3</sub> ) spectrum of compound <b>TTBQ</b> . (Figure S3) ..... | S5    |
| 4. HRMS spectrum of <b>TTBQ</b> . (Figure S4).....                                                        | S6    |

|                                                                                                                                    |         |
|------------------------------------------------------------------------------------------------------------------------------------|---------|
| 5. Job's plot of a 1:1 complex of <b>TTBQ</b> and $\text{Hg}^{2+}$ .(Figure S5).....                                               | S7      |
| 6. The plot of $A_0/(A_0-A_{352\text{nm}})$ against $1/C_g$ at 352 nm.. (Figure S6).....                                           | S8      |
| 7. Fluorescence responses of <b>TTBQ</b> to various metal ions. (Figure S7).....                                                   | S9      |
| 8. pH-dependent Fluorescence intensity ratio of <b>TTBQ</b> plus $\text{Hg}^{2+}$ in aerated aqueous solution.<br>(Figure S8)..... | S10     |
| 9. Association Constant Derivation from Absorption titration.....                                                                  | S11-S12 |

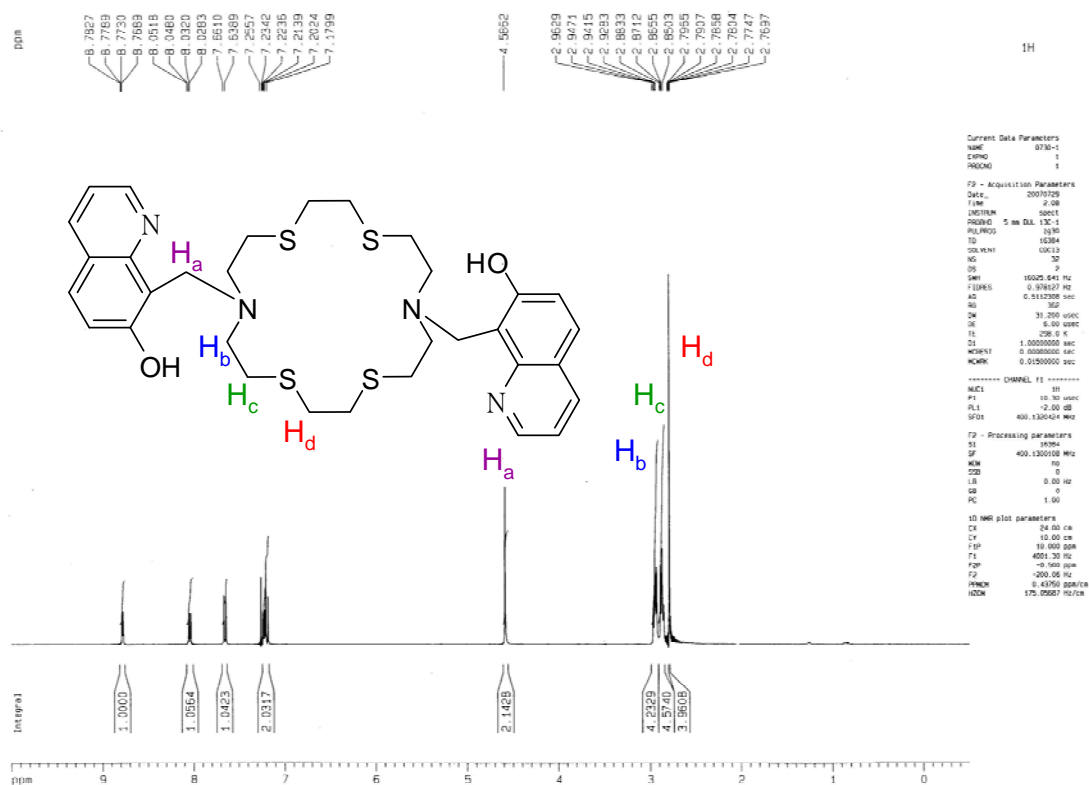

**Figure S1.**  $^1\text{H}$  NMR spectra of TTBQ in  $\text{CDCl}_3$ .

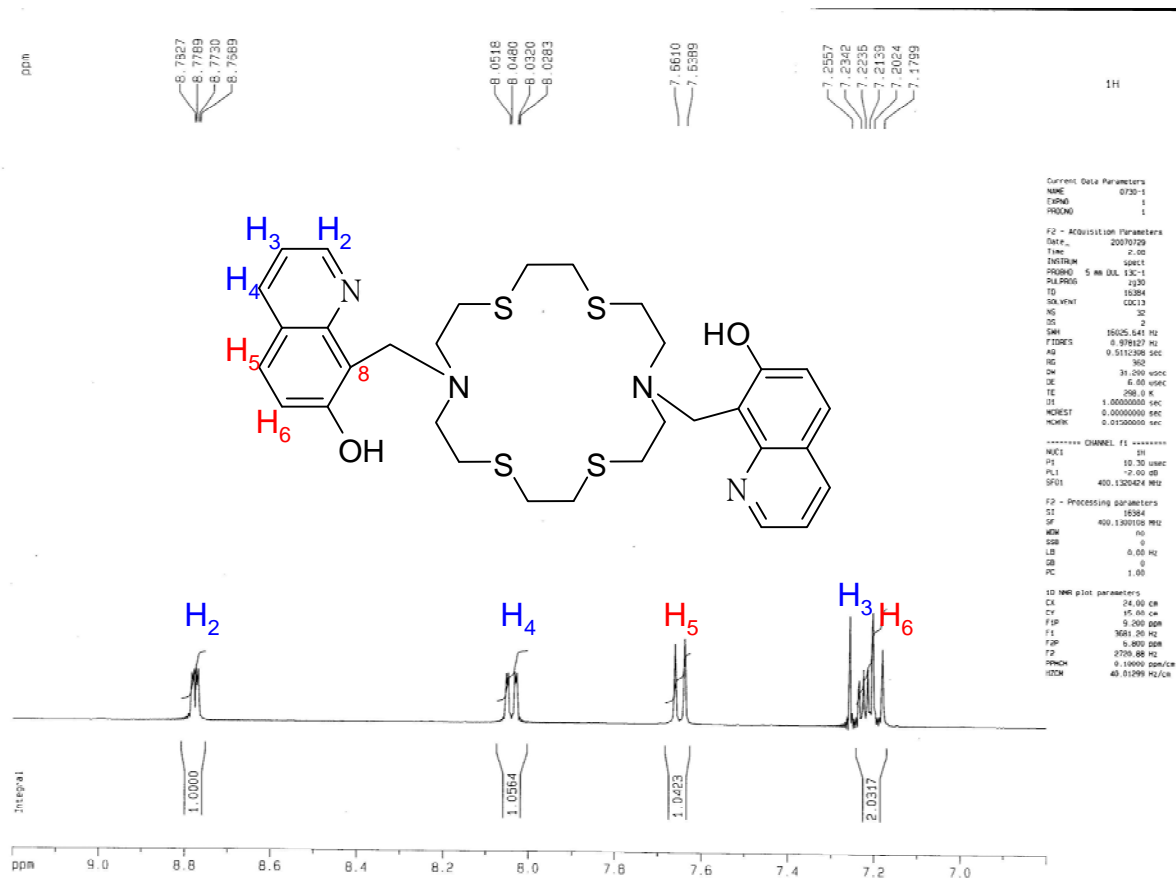

**Figure S2.** The extension of  $^1\text{H}$  NMR spectra of **TTBQ** in CDCl<sub>3</sub>.



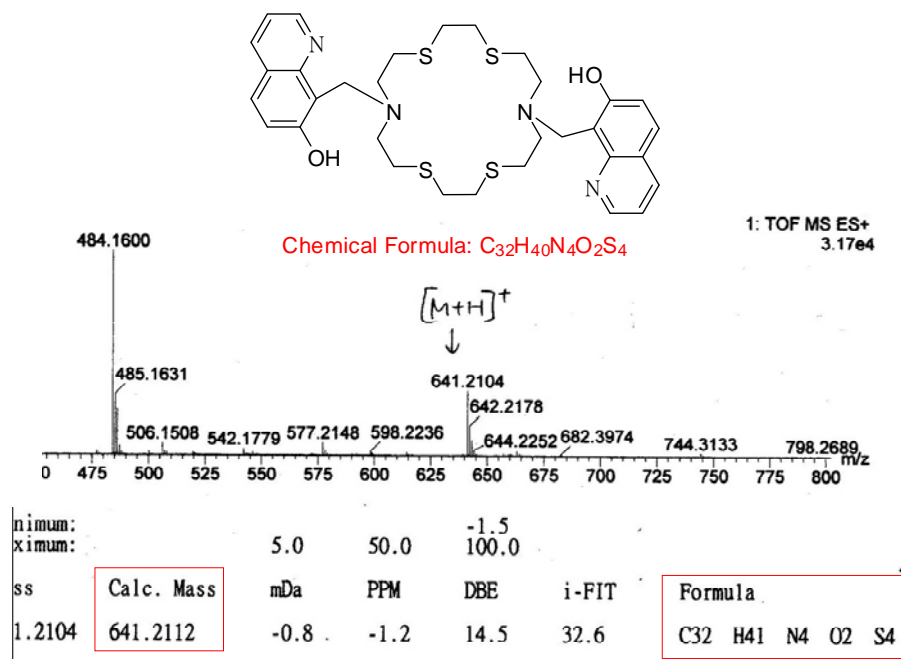

**Figure S4.** HRMS of **TTBQ** in  $CDCl_3$ . (125MHz)

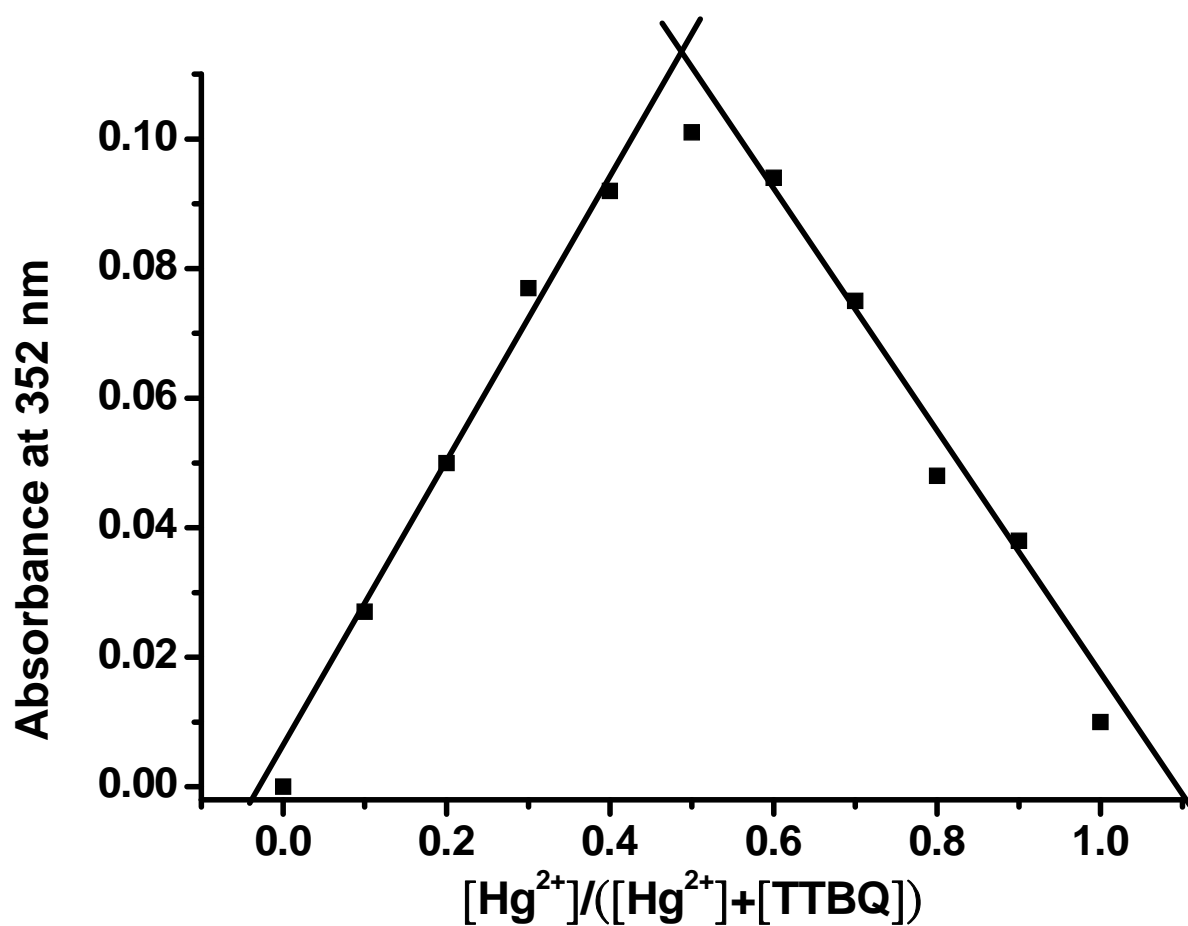

**Figure S5.** Job's plot of a 1:1 complex of TTbQ and  $\text{Hg}^{2+}$ , where the increase of absorption at 352 nm was plotted against the mole fraction of  $\text{Hg}^{2+}$ .  $[\text{TTbQ}] + [\text{Hg}^{2+}] = 1.50 \mu\text{M}$ .

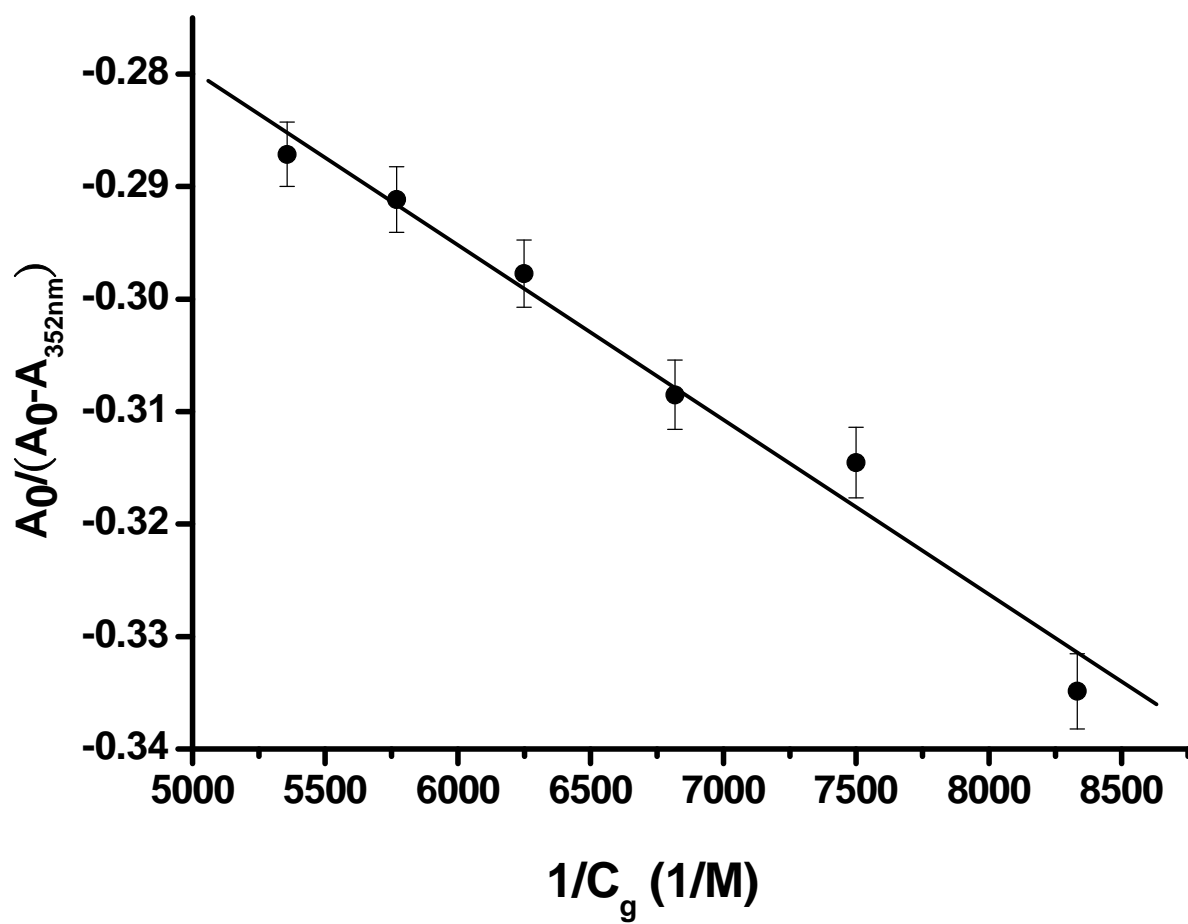

**Figure S6.** The plot of  $A_0/(A_0-A_{352\text{nm}})$  against  $1/C_g$  at 352 nm.  $K_a = 13,020 \pm 520 \text{ M}^{-1}$ .



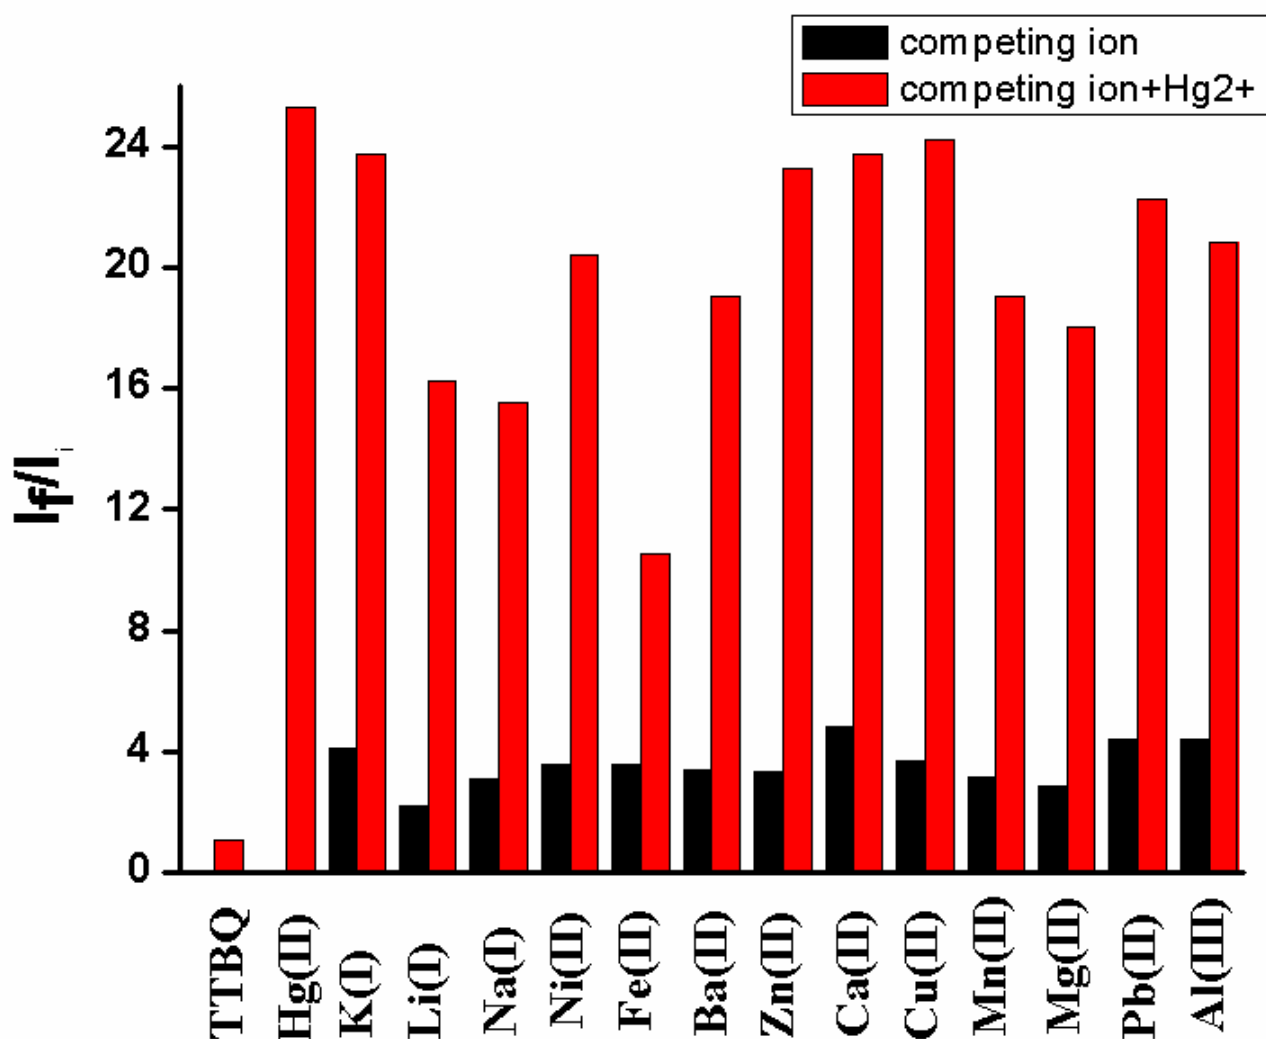

**Figure S7.** Fluorescence responses of **TTBQ** to various metal ions. Bars represent the final integrated fluorescence response ( $I_f$ ) over the initial integrated emission ( $I_i$ ). Initial spectrum was acquired in aerated solution, pH 7. Black bars represent the addition of the appropriate metal ion (1 mM for  $\text{Li}^+$ ,  $\text{Na}^+$ ,  $\text{K}^+$ ,  $\text{Mg}^{2+}$  and  $\text{Ca}^{2+}$ , 250  $\mu\text{M}$  for  $\text{Fe}^{2+}$  and  $\text{Cu}^{2+}$ , and 300  $\mu\text{M}$  for all other cations) to a 1.5  $\mu\text{M}$  solution of **TTBQ**. Red bars represent the addition of 0.5 mM  $\text{Hg}^{2+}$  to solutions containing **TTBQ**. Excitation was provided at 352 nm, and the emission was integrated over 400 to 700 nm.

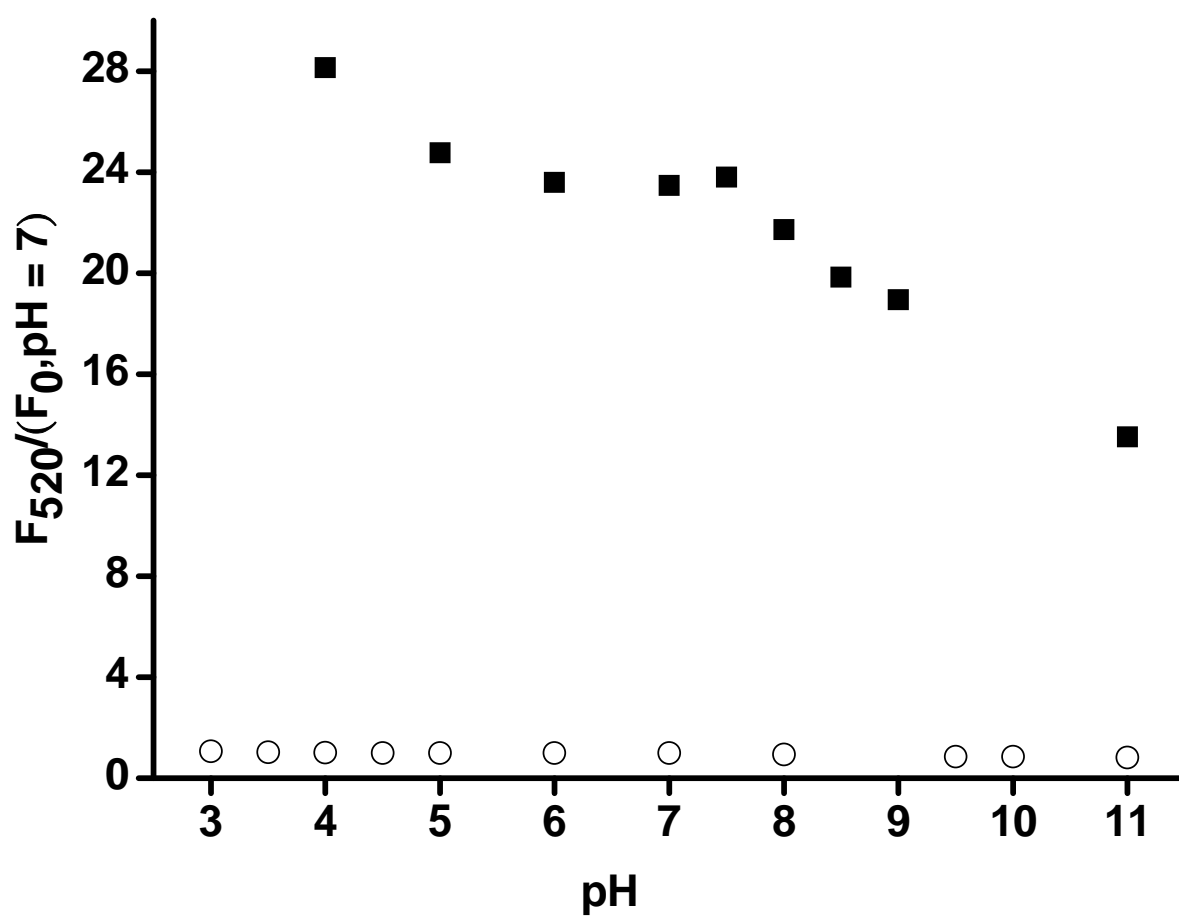

**Figure S8.** pH-dependent Fluorescence intensity ratio ( $F_{520}/(F_0, \text{pH} = 7)$ ) of **TTbQ** (circle, 1.5  $\mu\text{M}$ ) plus  $\text{Hg}^{2+}$  (square, 280  $\mu\text{M}$ ) in aerated aqueous solution.  $\lambda_{\text{ex}} = 355 \text{ nm}$ .

**Association Constant Derivation from Absorption titration.** The association constant  $K_a$  of

**TTBQ** +  $\text{Hg}^{2+}$  complex formation calculated by the UV-Vis absorption method can be derived as follows

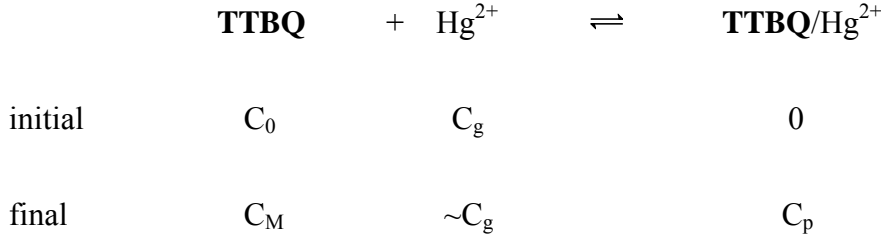

On the above expression the association constant is assumed to be not very large so that the concentration of the added  $\text{Hg}^{2+}$  varies negligibly during the reaction (see text). The absorbance of **TTBQ** at e.g. 352 nm prior to the addition of  $\text{Hg}^{2+}$  can be expressed by

$$A_0 = C_0 \varepsilon_M \therefore C_0 = \frac{A_0}{\varepsilon_M}$$

Upon adding the guest molecule  $C_g$

$$C_0 = \frac{A_0}{\varepsilon_M} = C_M + C_p$$

$$\therefore C_p = \frac{A_0}{\varepsilon_M} - C_M \quad (1) \quad \text{On the other hand, } K_a = \frac{C_p}{C_M C_g}$$

$$\therefore C_p = K_a C_g C_M \quad (2)$$

$$(1) = (2) \therefore \frac{A_0}{\varepsilon_M} - C_M = K_a C_g C_M \Rightarrow C_M = \frac{A_0}{\varepsilon_M (K_a C_g + 1)}$$

The absorbance of **TTBQ** and **TTBQ/Hg<sup>2+</sup>** complex at a specific wavelength can be expressed by

$$\begin{aligned} A &= \varepsilon_M C_M + \varepsilon_p C_p = \varepsilon_M C_M + \varepsilon_p \left( \frac{A_0}{\varepsilon_M} - C_M \right) = (\varepsilon_M - \varepsilon_p) C_M + \frac{\varepsilon_p A_0}{\varepsilon_M} \\ &= \frac{(\varepsilon_M - \varepsilon_p) A_0}{\varepsilon_M (K_a C_g + 1)} + \frac{\varepsilon_p A_0}{\varepsilon_M} \end{aligned}$$

$$\therefore \frac{A}{A_0} = \frac{(\varepsilon_M - \varepsilon_p)}{\varepsilon_M (K_a C_g + 1)} + \frac{\varepsilon_p}{\varepsilon_M} = \frac{(\varepsilon_M - \varepsilon_p) + \varepsilon_p (K_a C_g + 1)}{\varepsilon_M (K_a C_g + 1)} \quad (3)$$

Subtracting (1) from both sides of (3) we obtain

$$\begin{aligned}
\therefore \frac{A}{A_0} - 1 &= \frac{(\varepsilon_M - \varepsilon_p) + \varepsilon_p (K_a C_g + 1) - \varepsilon_M (K_a C_g + 1)}{\varepsilon_M (K_a C_g + 1)} \\
\therefore \frac{A - A_0}{A_0} &= \frac{(\varepsilon_M - \varepsilon_p) + (\varepsilon_p - \varepsilon_M)(K_a C_g + 1)}{\varepsilon_M (K_a C_g + 1)} = \frac{(\varepsilon_p - \varepsilon_M)(K_a C_g)}{\varepsilon_M (K_a C_g + 1)} \\
\therefore \frac{A_0}{A_0 - A} &= \frac{\varepsilon_M (K_a C_g + 1)}{(\varepsilon_M - \varepsilon_p)(K_a C_g)} = \left( \frac{\varepsilon_M}{\varepsilon_M - \varepsilon_p} \right) \left[ \frac{1}{K_a C_g} + 1 \right] \quad (4)
\end{aligned}$$
